# Supplementary material for: Cholinergic drugs bind at the minor groove and reverse induced oxidative stress of calf thymus DNA: a new perspective towards an unexplored therapeutic efficacy
Source: Royal Society of Chemistry journal article supplement (doi:10.1039/d1nj01911b), 2021-01-01

**SUPPLEMENTARY MATERIAL**

*associated with the article*

**Cholinergic drugs bind at minor groove and reverse induced oxidative stress of calf thymus DNA: A new perspective towards an unexplored therapeutic efficacy**

*Prayasee Baruah,<sup>a</sup> Pynskhemborlang Tep Phanrang,<sup>a</sup> Ibemhanbi Konthoujam,<sup>b</sup> Kripamoy Aguan,<sup>b</sup> and Sivaprasad Mitra<sup>a,\*</sup>*

*Centre for Advanced Studies in Chemistry and Department of Biotechnology & Bioinformatics, North-Eastern Hill University, Shillong – 793 022, India*

<sup>a</sup>Centre for Advanced Studies in Chemistry; <sup>b</sup>Department of Biotechnology & Bioinformatics.

Journal: New Journal of Chemistry

## CONTENTS

| Sr. No. | Item                                                                                                                                    | Page |
|---------|-----------------------------------------------------------------------------------------------------------------------------------------|------|
| 01      | <b>ST-1.</b> Time resolved fluorescence decay parameters and calculated average decay times of the AD drugs in aqueous buffer solution. | 3    |
| 02      | <b>Fig. S1.</b> Competitive binding of HOESCHT 3338 with ct-DNA in presence of cholinergic drugs TAC, ESE and HuPA.                     | 4    |
| 03      | <b>Fig. S2.</b> Interaction of HOESCHT 3338 with cholinergic drug DON.                                                                  | 5    |
| 04      | <b>Fig. S3.</b> Quenching of drug (TAC, ESE and HuPA) fluorescence by NaF in presence of ct-DNA                                         | 6    |

**ST-1.** Time resolved fluorescence decay parameters and calculated average decay times of the AD drugs in aqueous buffer solution.

| Drug | $\alpha_1$ | $\tau_1$ /ns | $\alpha_2$ | $\tau_2$ /ns | $\tau_{av}$ /ns |
|------|------------|--------------|------------|--------------|-----------------|
| DON  | 0.83       | 1.37         | 0.17       | 4.38         | 2.56            |
| TAC  | 0.92       | 1.99         | 0.08       | 1.21         | 1.95            |
| ESE  | 0.79       | 4.89         | 0.21       | 7.72         | 5.73            |
| HuPA | 0.82       | 2.99         | 0.18       | 3.51         | 3.10            |

**Fig. S1.** Competitive binding of HOESCHT 3338 with ct-DNA in presence of cholinergic drugs TAC, ESE and HuPA.

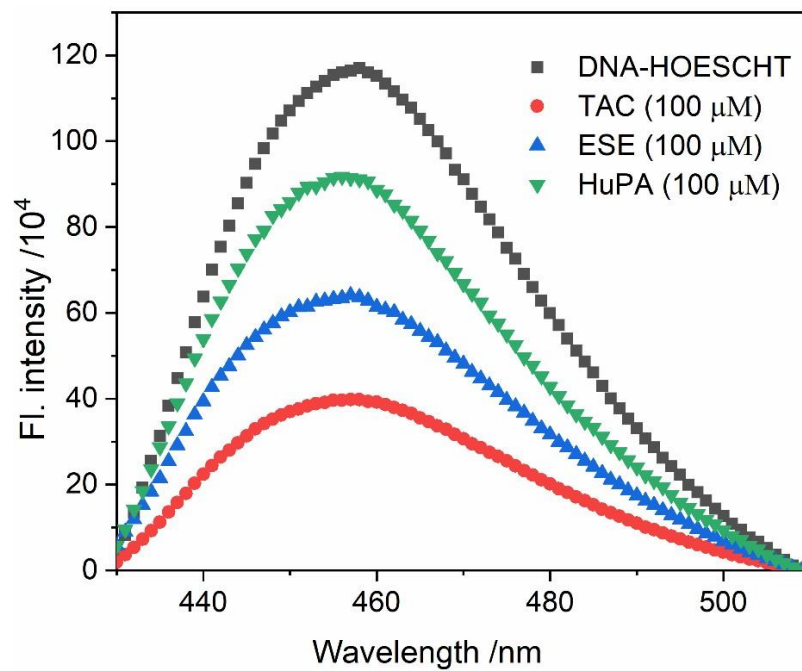

**Fig S2.** Fluorescence emission of DON in absence and presence of HOESCHT (left spectra) and fluorescence emission of HOESCHT in absence and presence of DON (right spectra).

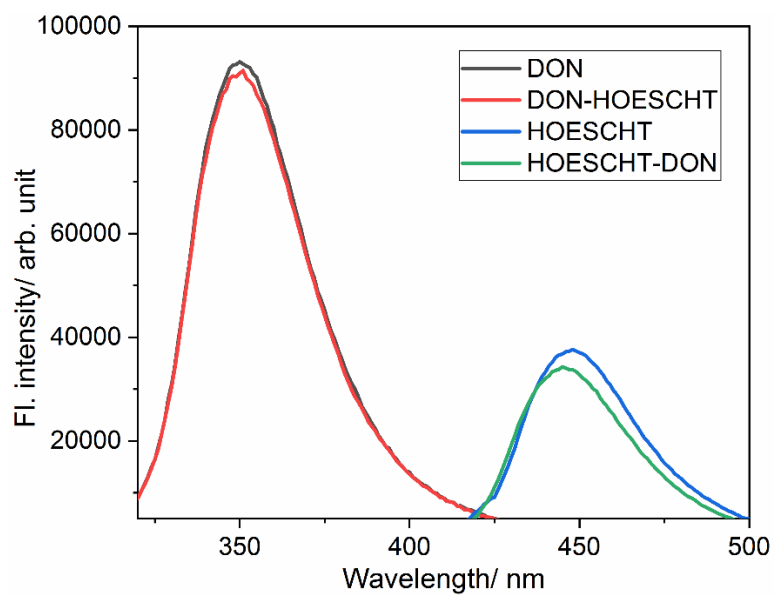

**Fig. S3.** Quenching of drug (TAC, ESE and HuPA) fluorescence by NaF in presence of ct-DNA.

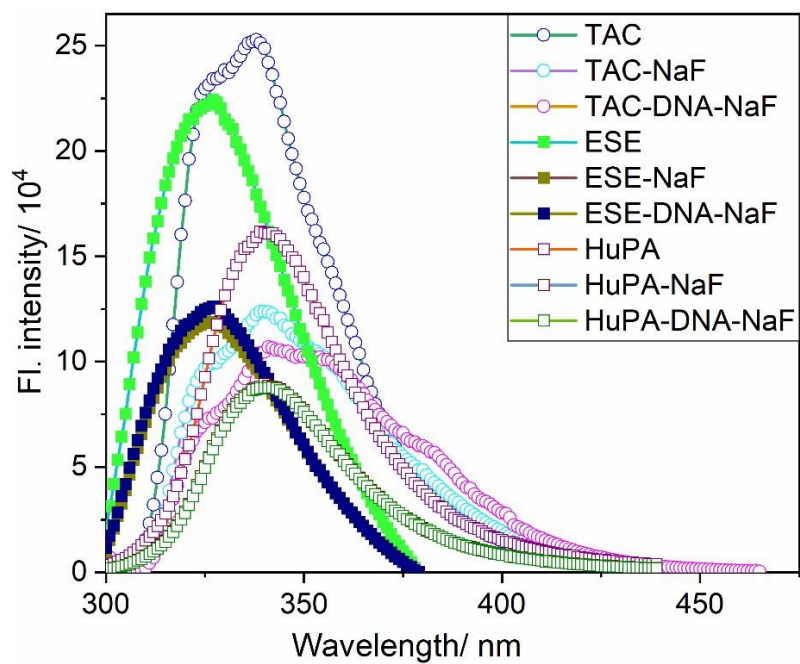

Supplement: d1nj01911b1.pdf [file d1nj01911b1.pdf]
